# Supplementary material for: Alkali metal-modified crystalline carbon nitride for photocatalytic nitrogen fixation
Source: Royal Society of Chemistry journal article supplement (doi:10.1039/d2dt02731c), 2022-01-01
Supplement: d2dt02731c1.pdf [file d2dt02731c1.pdf]

## **Alkali metal-modified crystalline carbon nitride for photocatalytic Nitrogen Fixation**

**Yang Li,<sup>abc\*</sup> Baibing Wang,<sup>b</sup> Quan-Jun Xiang,<sup>c</sup> Qin Zhang,<sup>b</sup> and Gui Chen<sup>a\*</sup>**

<sup>a</sup> School of Environment and Civil Engineering, Dongguan University of Technology,  
Dongguan, Guangdong, P. R. China

<sup>b</sup> Key Laboratory of Poyang Lake Basin Agricultural Resource and Ecology of  
Jiangxi Province, College of Land Resource and Environment, Jiangxi Agricultural  
University, Nanchang 330045, China

<sup>c</sup> State Key Laboratory of Electronic Thin Film and Integrated Devices,  
University of Electronic Science and Technology of China,

Chengdu 610054, P. R. China;

\*Correspondence author's e-mail: [liyang4672@163.com](mailto:liyang4672@163.com); [chengui@dgut.edu.cn](mailto:chengui@dgut.edu.cn);

## Table

Table S1 Specific surface areas of LK-HTCN, KN-HCN, LKN-HTCN and LN-HTCN

| <b>Samples</b>  | <b>Specific surface areas<br/>(m<sup>2</sup>/g)</b> |
|-----------------|-----------------------------------------------------|
| <b>LK-HTCN</b>  | <b>47.45</b>                                        |
| <b>KN-HCN</b>   | <b>16.14</b>                                        |
| <b>LKN-HTCN</b> | <b>58.24</b>                                        |
| <b>LN-HTCN</b>  | <b>53.07</b>                                        |

## Figures

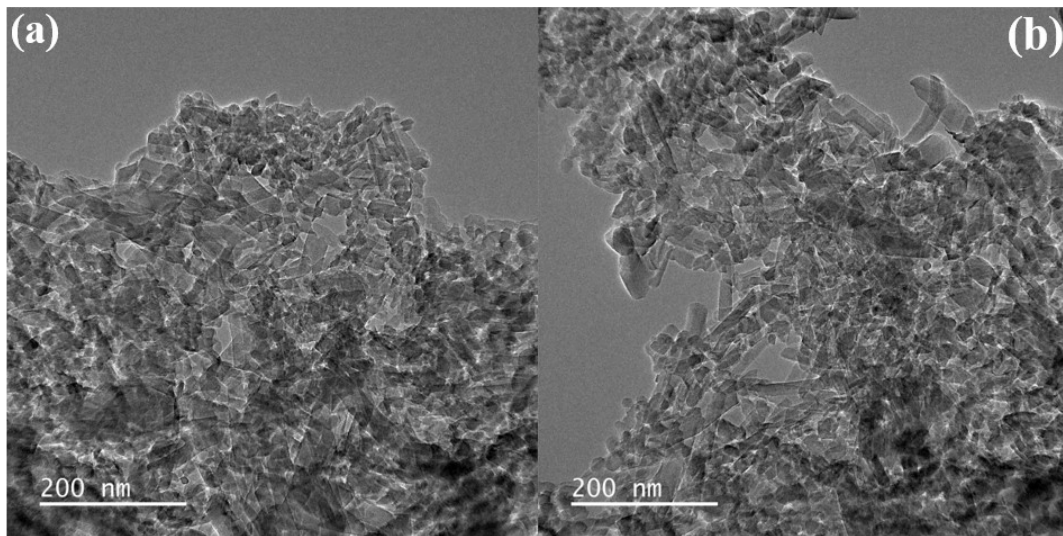

**Fig. S1** TEM images of the LK-HTCN.

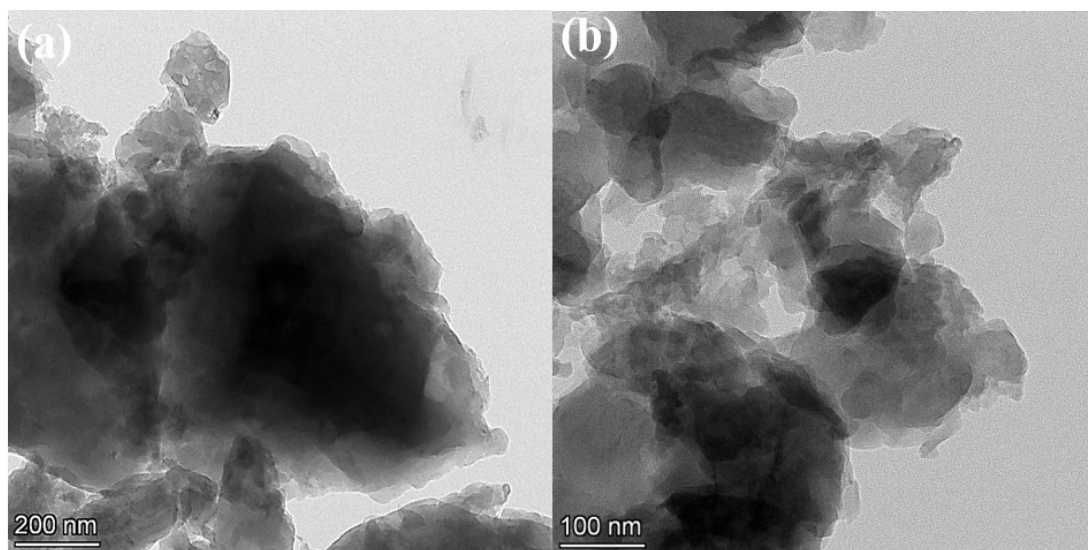

**Fig. S2** TEM images of the KN-HCN.

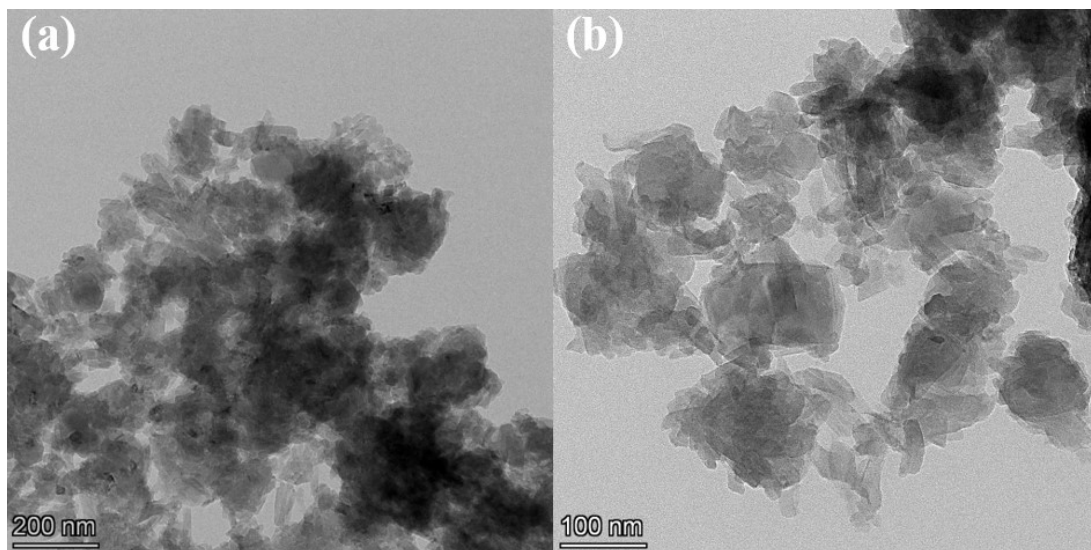

**Fig. S3** TEM images of the LKN-HTCN.

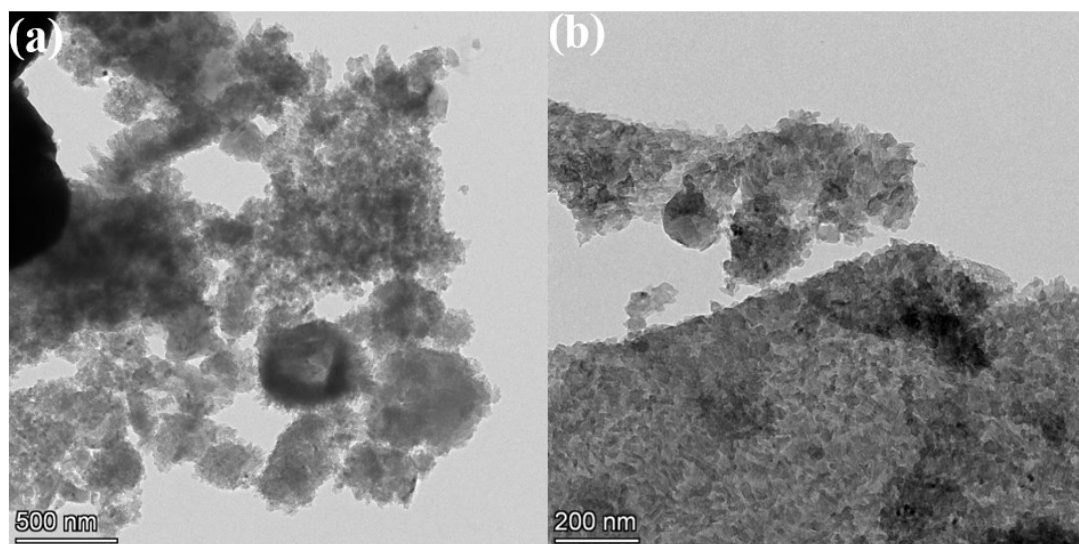

**Fig. S4** TEM images of the LN-HTCN.

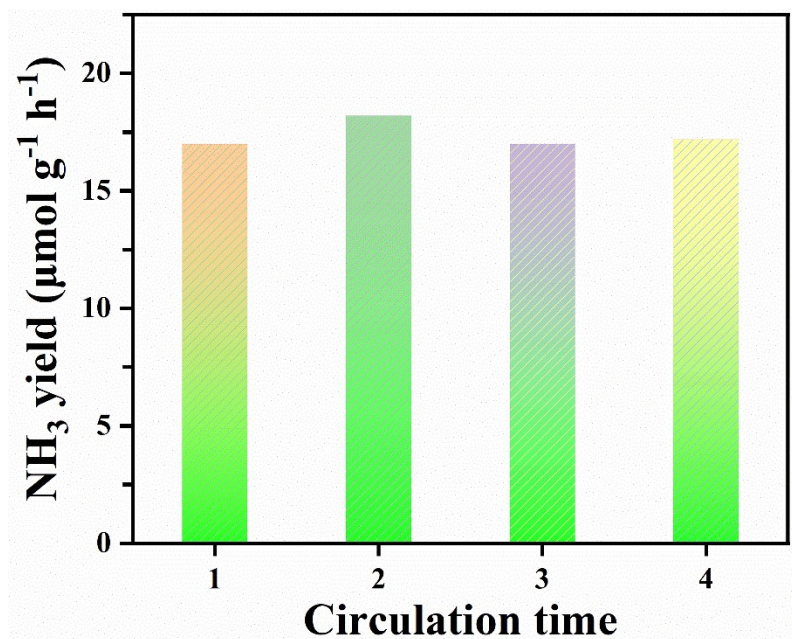

**Fig. S5** The cycling photocatalytic nitrogen fixation experiments over the KN-HCN photocatalyst.
